# Supplementary material
Source: MDPI journal article supplement (https://www.mdpi.com/2073-4441/15/8/1597)
Supplement: s1 [file s1]

**Table S1.** Stations, sampling localities, seasons, and measurements of length, width, and weights of all the specimens analyzed in the present study.

| Station | Locality                           | Season        | Sample | Length (cm) | Width (cm) | Weight (g) |
|---------|------------------------------------|---------------|--------|-------------|------------|------------|
| SZ 1    | 'Chiapparo', Santa Caterina, Nardò | <i>Spring</i> | A34    | 18.6        | 3.3        | 169.5      |
|         |                                    |               | A35    | 17.9        | 4.6        | 207.2      |
|         |                                    |               | A36    | 18.3        | 4.6        | 209.3      |
|         |                                    |               | A37    | 14.2        | 4.3        | 137.2      |
|         |                                    |               | A38    | 18.5        | 7.5        | 301        |
|         |                                    | <i>Autumn</i> | A39    | 17.4        | 5.8        | 248.8      |
|         |                                    |               | A40    | 12.1        | 3.5        | 70.6       |
|         |                                    |               | A41    | 16.6        | 4.4        | 164.8      |
|         |                                    |               | A42    | 18.3        | 5.4        | 138.6      |
|         |                                    |               |        |             |            |            |
| SZ 2    | 'Torre Vado', Morciano di Leuca    | <i>Spring</i> | A14    | 10.5        | 4          | 80         |
|         |                                    |               | A15    | 15          | 3.5        | 93         |
|         |                                    |               | A16    | 14.8        | 3          | 67.5       |
|         |                                    |               | A17    | 13.7        | 3.3        | 87.6       |
|         |                                    |               | A18    | 14.3        | 4.8        | 117.9      |
|         |                                    |               | A19    | 15.5        | 2.7        | 69.4       |
|         |                                    |               | A20    | 12.5        | 4.3        | 88.7       |
|         |                                    |               | A21    | 14.4        | 4.3        | 124.8      |
|         |                                    | <i>Autumn</i> | A1     | 12.8        | 4          | 117.1      |
|         |                                    |               | A2     | 15.5        | 4          | 135.7      |
|         |                                    |               | A3     | 13.5        | 3          | 102.2      |
|         |                                    |               | A4     | 15.5        | 3.5        | 118.7      |
|         |                                    |               | A5     | 14.5        | 4.5        | 122.5      |
|         |                                    |               | A6     | 15.5        | 4.2        | 131.8      |
| SZ 3    | 'Grotta Verde', Tricase            | <i>Spring</i> | A30    | 14          | 4.4        | 113        |
|         |                                    |               | A31    | 16.2        | 3.7        | 141.9      |
|         |                                    |               | A32    | 15          | 4.2        | 103.8      |
|         |                                    |               | A33    | 18.2        | 4.8        | 210.1      |
|         |                                    | <i>Autumn</i> | A7     | 15.3        | 4          | 145        |
|         |                                    |               | A8     | 12.5        | 2.8        | 94         |
|         |                                    |               | A9     | 17.2        | 4.8        | 224.2      |
|         |                                    |               | A10    | 16.6        | 4.5        | 166.5      |
|         |                                    |               | A11    | 16          | 3.5        | 112.1      |
|         |                                    |               | A12    | 14          | 3          | 134.5      |
| SZ 4    | 'Torre Guaceto' M.P.A., Brindisi   | <i>Spring</i> | A22    | 14.3        | 4.4        | 98.9       |
|         |                                    |               | A23    | 15.5        | 4.7        | 137.4      |
|         |                                    |               | A24    | 15.4        | 4.3        | 135.9      |
|         |                                    |               | A25    | 15          | 2.3        | 72.3       |
|         |                                    |               | A26    | 15.9        | 4.7        | 120.8      |
|         |                                    |               | A27    | 13.1        | 3.5        | 84.1       |
|         |                                    |               | A28    | 14.1        | 5.5        | 200.4      |
|         |                                    |               | A29    | 17.7        | 5.2        | 176.8      |
|         |                                    | <i>Autumn</i> | A43    | 17.3        | 5.2        | 191.3      |
|         |                                    |               | A44    | 16.4        | 3.2        | 92.4       |
|         |                                    |               | A45    | 18.5        | 4          | 166.9      |
|         |                                    |               | A46    | 17.6        | 4.5        | 124.8      |
|         |                                    |               | A47    | 14.3        | 3.8        | 156.2      |
